# Supplementary material for: NiSnO3 nanoparticles/reduced graphene oxide composite with enhanced performance as a lithium-ion battery anode material
Source: Royal Society of Chemistry journal article supplement (doi:10.1039/c6ra13186g), 2016-01-01
Supplement: c6ra13186g1.pdf [file c6ra13186g1.pdf]

## Supporting Information

# NiSnO<sub>3</sub> Nanoparticles/Reduced Graphene Oxide Composite with Enhanced Performance as Lithium-Ion Battery Anode

Junjie Chen<sup>a,b</sup>, Mingzhong Zou<sup>a,b</sup>, Jiaxin Li<sup>c</sup>, Weiwei Wen<sup>a,b</sup>, Liqin Jiang<sup>a,b</sup>, Luzhuo  
Chen<sup>a,b</sup>, Qian Feng<sup>a,b,\*</sup>, Zhigao Huang<sup>a,b</sup>

<sup>a</sup>College of Physics and Energy, Fujian Normal University, Fujian Provincial Key Laboratory of  
Quantum Manipulation and New Energy Materials, Fuzhou, 350117, China.

<sup>b</sup>Fujian Provincial Collaborative Innovation Center for Optoelectronic Semiconductors and  
Efficient Devices, Xiamen, 361005, China

<sup>c</sup>Fujian Institute of Research on the Structure of Matter, Chinese Academy of Sciences, Fuzhou  
350002, China

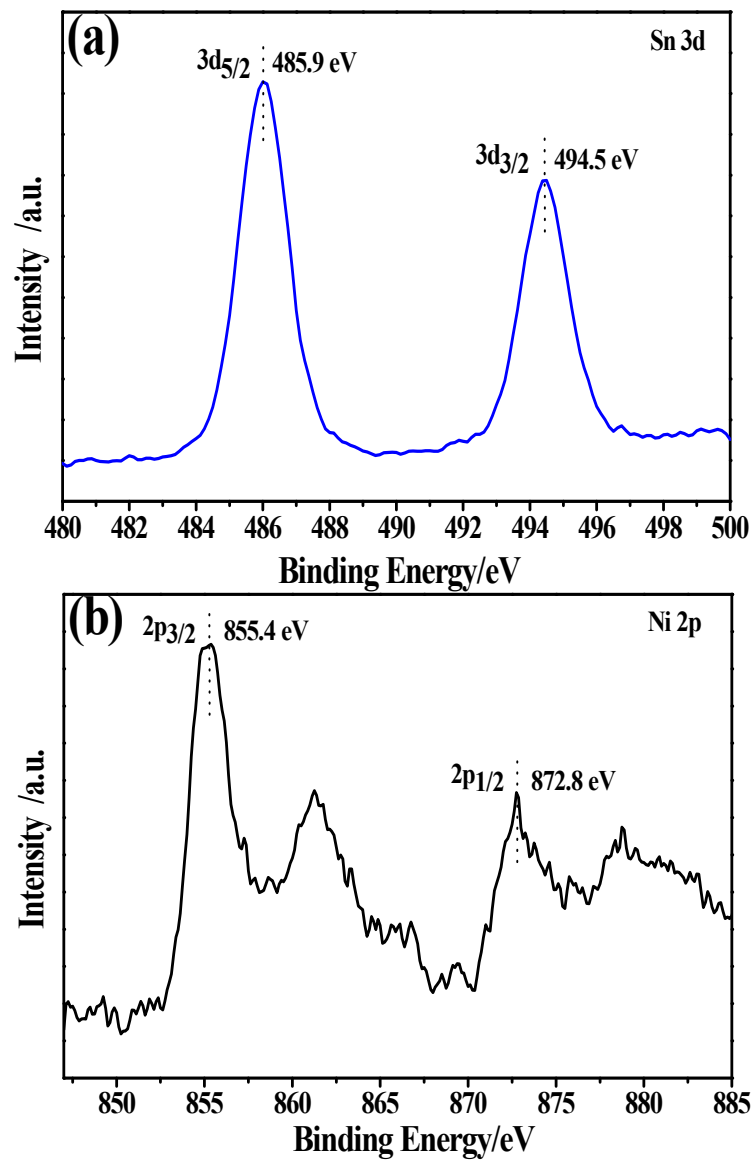

Fig. S1. (a) Sn 3d and (b) Ni 2p XPS of NiSnO<sub>3</sub>/RGO.

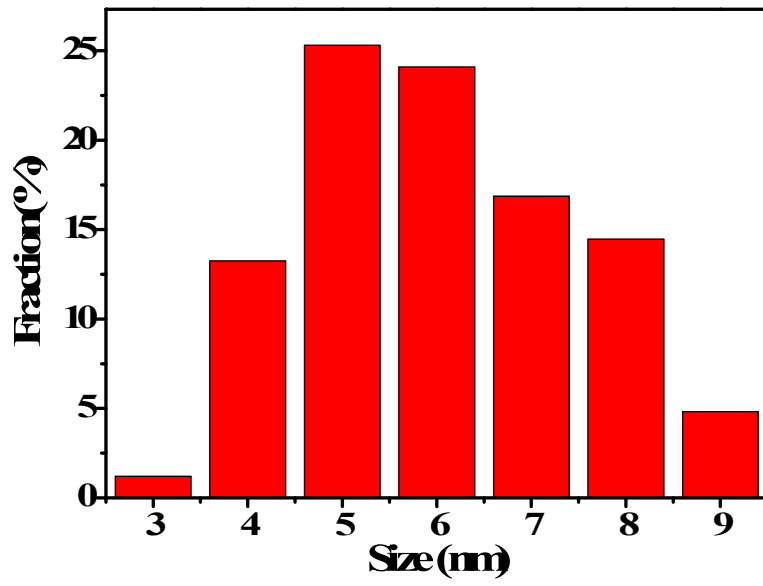

**Fig. S2.** The particle size distribution picture measured directly from Fig. 2d.

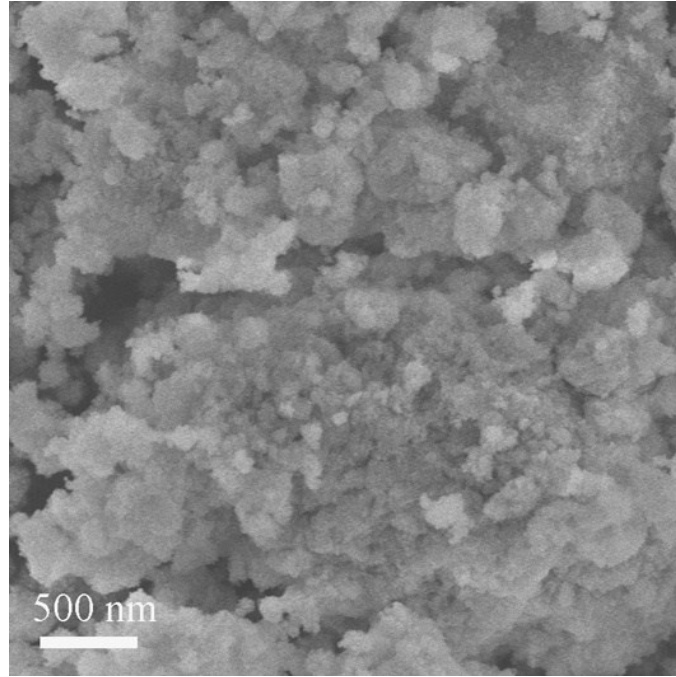

**Fig. S3.** A representative SEM image of bare NiSnO<sub>3</sub> nanoparticles, which shows that most of them stack with each other and tend to aggregate in the absence of RGO.

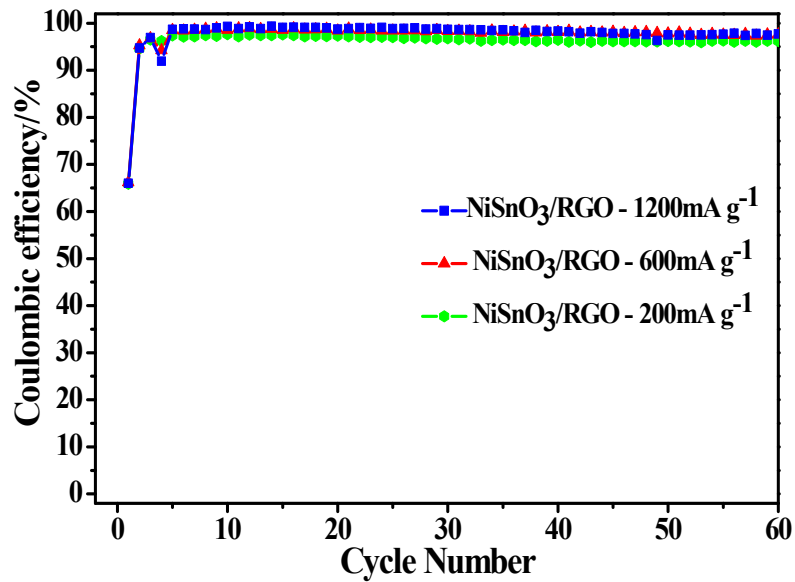

**Fig. S4.** The Coulombic efficiencies of NiSnO<sub>3</sub>/RGO nanocomposites at a current density of 200 mA g<sup>-1</sup>, 600 mA g<sup>-1</sup> and 1200 mA g<sup>-1</sup>.

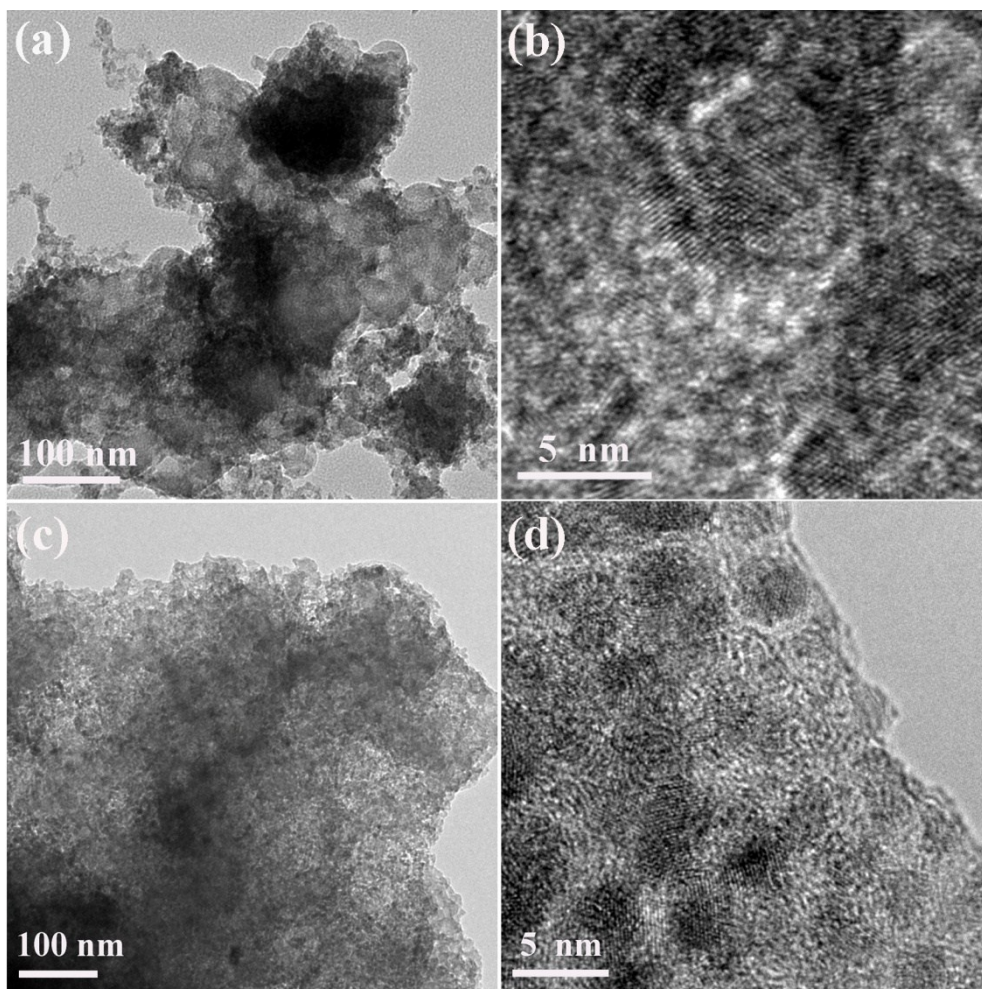

**Fig. S5.** TEM images of (a) and (b) NiSnO<sub>3</sub>, (c) and (d) NiSnO<sub>3</sub>/RGO electrodes after 60 cycles of charge/discharge test at 600 mA g<sup>-1</sup>.

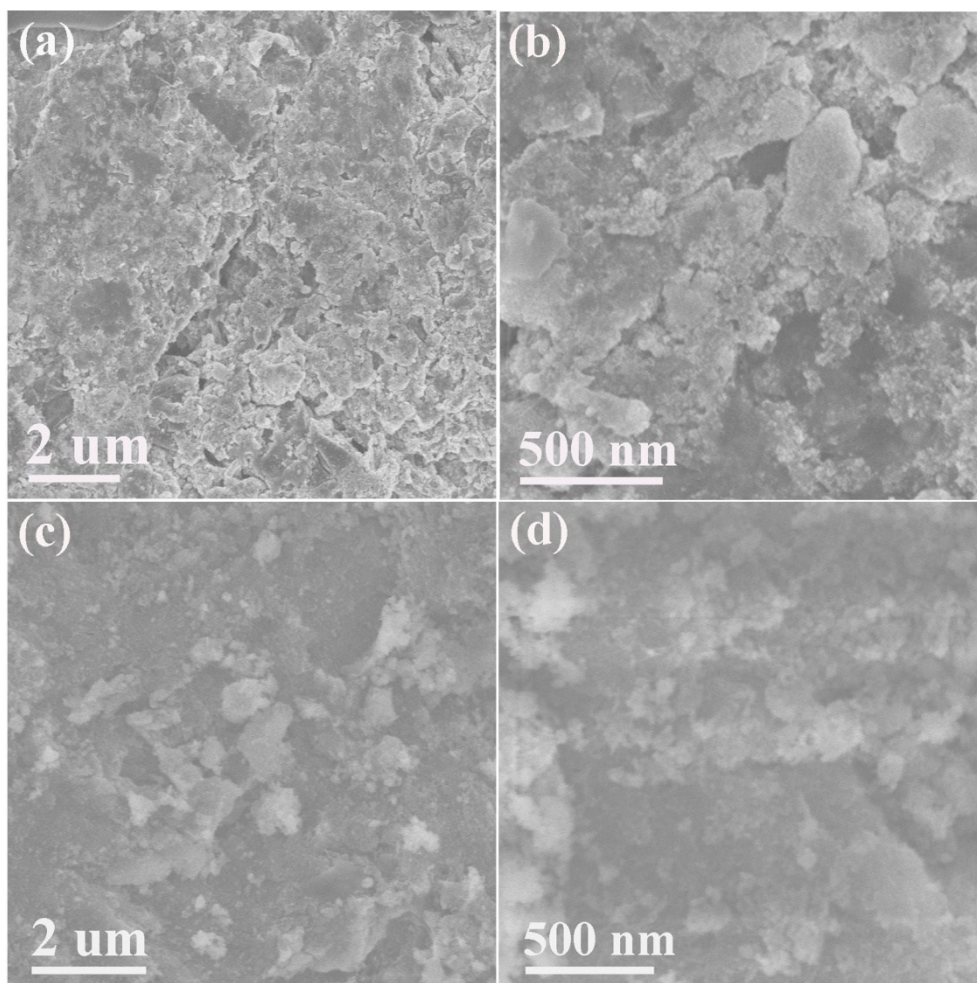

**Fig. S6.** SEM images of NiSnO<sub>3</sub>/RGO electrode in different test stage: (a) and (b) the initial electrode, (c) and (d) the electrode after 30 cycles at various magnifications.

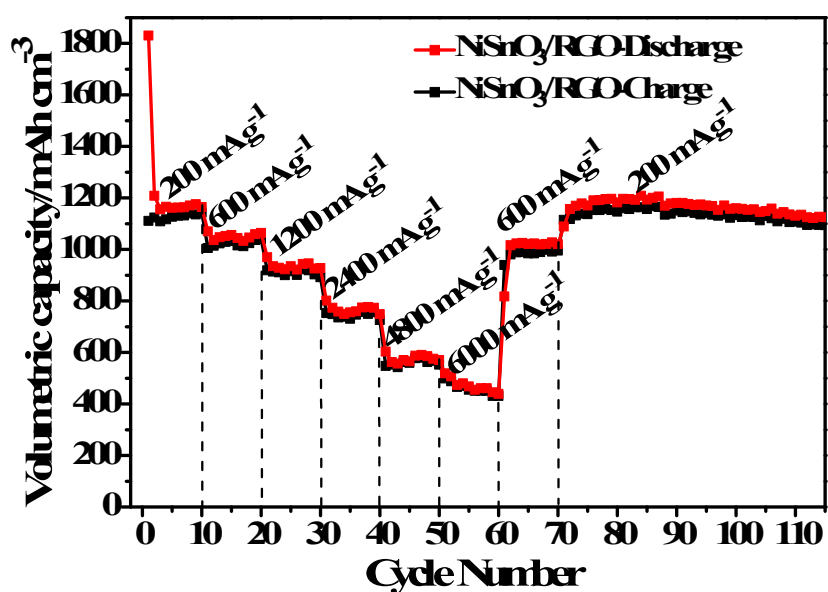

-1

**Fig. S7.** The volumetric rate capacity of NiSnO<sub>3</sub>/RGO electrode at various current densities between 200 and 6000 mA g<sup>-1</sup>.

**Table S1** Impedance parameters of NiSnO<sub>3</sub>/RGO and NiSnO<sub>3</sub> electrodes tested after 8 cycles at room temperature.

| Electrode               | R <sub>e</sub> (Ω) | R <sub>s</sub> (Ω) | R <sub>ct</sub> (Ω) |
|-------------------------|--------------------|--------------------|---------------------|
| NiSnO <sub>3</sub> /RGO | 16.1               | 83.0               | 32.7                |
| NiSnO <sub>3</sub>      | 12.9               | 676.7              | 163.7               |
